# Supplementary material for: The ACE Index: mapping childhood adversity in England
Source: PubMed Central journal article supplement (PMC7685852; doi:10.1093/pubmed/fdz158), 2019-12-27
Supplement: ace_index_supplementary_fdz158.pdf [file ace_index_supplementary_fdz158.pdf]

## **Supplementary Information**

1. Map of the ACE Index
2. Associations between the ACE index, its constituent domains and indicators, and the social and health effects of ACEs
3. Population rate of ACE indicators
4. Sources for ACE indicators, and denominators
5. Sources for the health and social effects of ACEs, and denominators
6. Imputation of district-level rates of child protection plans, children-in-need events and parents in drug and alcohol treatment
7. References for supplementary information

# 1 Map of the ACE Index

Rank of ACE Index by local authority. Higher rank indicates that ACEs are more frequent.

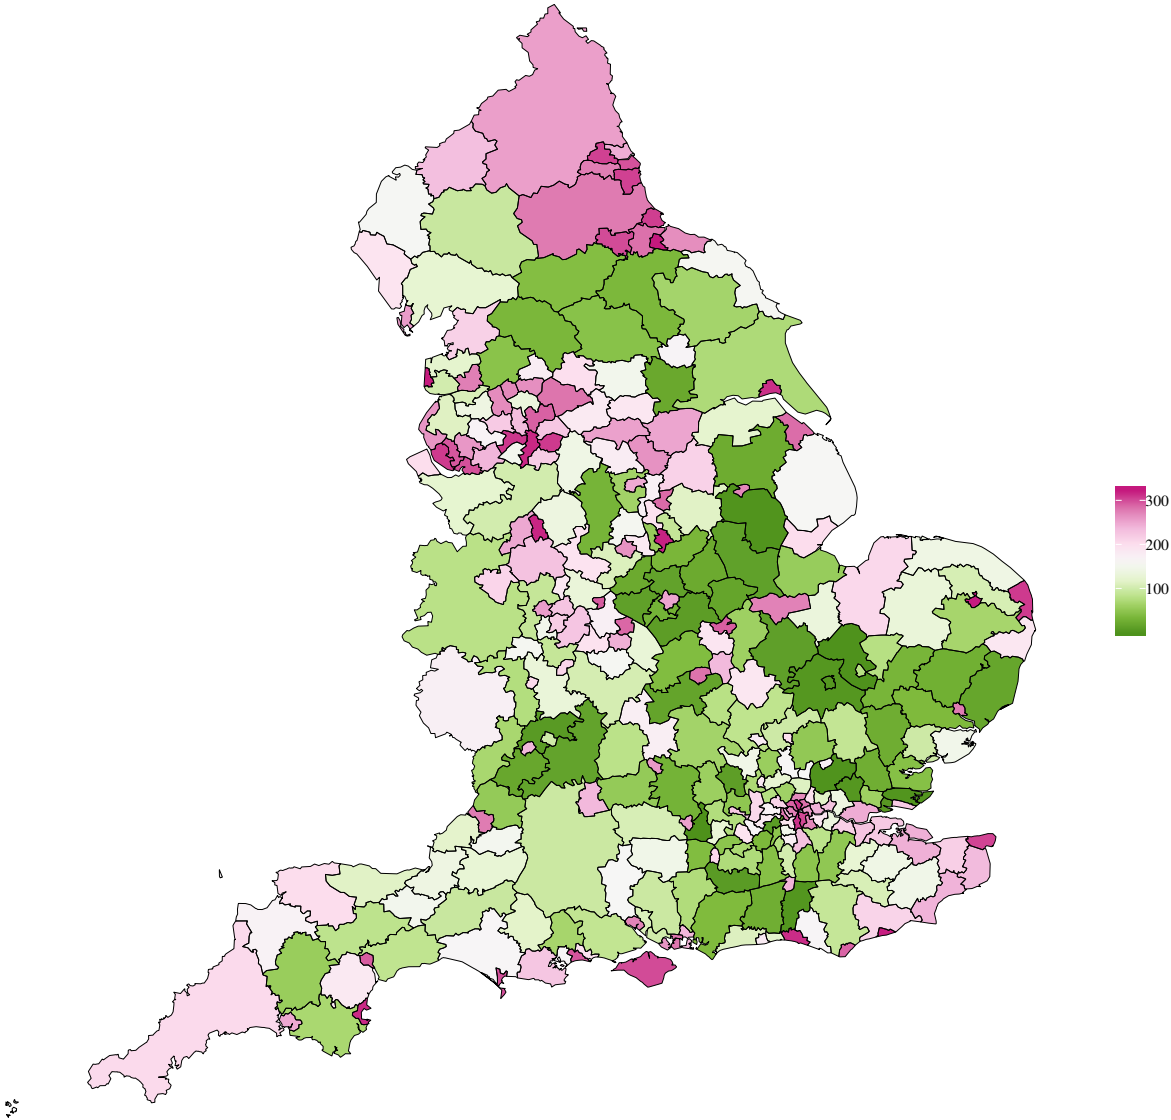

## 2 Associations between the ACE index, its constituent domains and indicators, and the social and health effects of ACEs

The figure below shows ecological correlations between the ACE Index and the potential health and social effects of ACEs. We used these correlations to help us design the ACE Index, including whether any indicators should be excluded and how domains should be transformed and weighted. We excluded family homelessness because it was negatively associated with many of the variables. This may be because accommodation is more expensive in wealthy areas that otherwise have lower rates of ACEs. At an individual family level, family homelessness is likely to be positively associated with ACEs, so this may reflect an ‘ecological paradox’. The meaningfulness of correlations for the domain scores and the ACE Index are limited by the fact that we used these variables to inform the design of the ACE Index, so the correlations are optimised.

**Figure: Pearson’s correlation coefficient between rates of ACEs and the health and social effects of ACEs, for local authorities in England**

|                                   | Under 18 conceptions | School exclusions | Admissions for self harm (age 10–24) | First remands | SEN register (SEM) | Primary school absences | Secondary school absences | Homelessness (age 16–24) | Admissions for substance use (under 18) | Admissions for alcohol (under 18) | NEET | School readiness |
|-----------------------------------|----------------------|-------------------|--------------------------------------|---------------|--------------------|-------------------------|---------------------------|--------------------------|-----------------------------------------|-----------------------------------|------|------------------|
| <b>ACE index</b>                  | 71                   | 32                | 20                                   | 62            | 42                 | 61                      | 43                        | 5                        | 39                                      | 40                                | 1    | 46               |
| <b>Maltreatment domain</b>        | 79                   | 38                | 36                                   | 52            | 34                 | 51                      | 49                        | -9                       | 46                                      | 49                                | 2    | 48               |
| CPP: abuse                        | 50                   | 18                | 27                                   | 30            | 26                 | 42                      | 31                        | -10                      | 32                                      | 38                                | 0    | 39               |
| CPP: neglect                      | 60                   | 30                | 34                                   | 29            | 21                 | 24                      | 39                        | -19                      | 38                                      | 50                                | -2   | 26               |
| Police: abuse                     | 62                   | 44                | 25                                   | 57            | 32                 | 40                      | 43                        | 3                        | 28                                      | 29                                | 3    | 35               |
| CIN: Abuse or neglect             | 67                   | 24                | 24                                   | 41            | 23                 | 46                      | 33                        | -2                       | 40                                      | 29                                | 5    | 44               |
| <b>Household domain</b>           | 50                   | 22                | 11                                   | 35            | 31                 | 47                      | 32                        | 7                        | 34                                      | 27                                | -2   | 29               |
| CIN: family                       | 17                   | 16                | 12                                   | 7             | 11                 | 14                      | 18                        | -7                       | 21                                      | 29                                | -7   | 1                |
| Family homelessness               | -10                  | -20               | -52                                  | 29            | 15                 | 17                      | -29                       | 82                       | -36                                     | -50                               | -7   | -15              |
| Lone parents                      | 51                   | 9                 | -21                                  | 60            | 32                 | 59                      | 14                        | 35                       | 12                                      | -6                                | 2    | 28               |
| Parents in drug/alcohol treatment | 35                   | 20                | 31                                   | 5             | 20                 | 24                      | 32                        | -12                      | 37                                      | 33                                | -1   | 30               |
| <b>Context domain</b>             | 44                   | 31                | 12                                   | 56            | 43                 | 50                      | 38                        | 7                        | 23                                      | 26                                | 4    | 34               |
| Police: drugs                     | 1                    | -1                | -29                                  | 39            | 28                 | 31                      | 2                         | 21                       | -12                                     | -13                               | -5   | 10               |
| Police: violence                  | 46                   | 34                | 15                                   | 54            | 41                 | 42                      | 34                        | 8                        | 25                                      | 22                                | 1    | 29               |
| Suicide                           | 43                   | 37                | 62                                   | 12            | 24                 | 22                      | 55                        | -33                      | 54                                      | 66                                | -1   | 25               |
| Police: weapons                   | 38                   | 19                | -14                                  | 55            | 29                 | 47                      | 16                        | 24                       | -2                                      | -4                                | 18   | 34               |

### 3 Population rate of ACE indicators

Histograms of frequency of individual ACE indicators by local authority. X-axes show the rate of events per 1000 person-years. 'Lone parents' is given as a prevalence of lone parents per 1000 households with dependent children

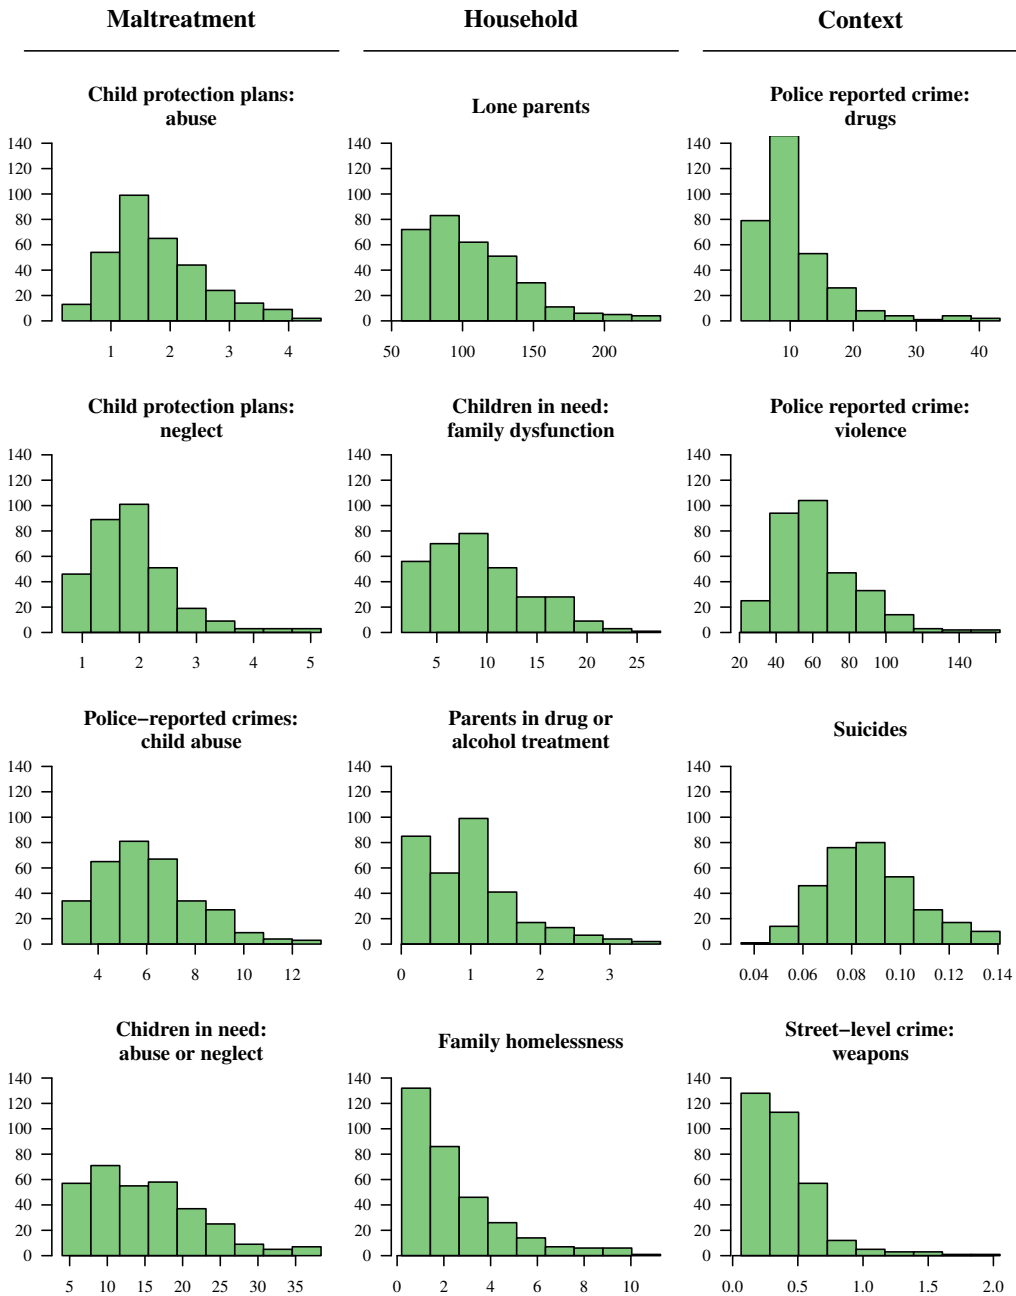

## 4 Sources for ACE indicators, and denominators

| Indicator                                 | Source                                                            | Smallest area of data availability | Years     | Count of events | Denominator age range | Denominator (person-years) |
|-------------------------------------------|-------------------------------------------------------------------|------------------------------------|-----------|-----------------|-----------------------|----------------------------|
| <b>Maltreatment domain</b>                |                                                                   |                                    |           |                 |                       |                            |
| Police recorded crime: abuse              | Police <sup>1</sup>                                               | Community Safety Partnership       | 2013-2017 | 476,890         | 0-18                  | 61,689,287                 |
| CPP: neglect                              | Department for Education <sup>2</sup>                             | County or unitary authority        | 2013-2017 | 116,766         | 0-18                  | 61,689,287                 |
| CPP: abuse                                | Department for Education <sup>2</sup>                             | County or unitary authority        | 2013-2017 | 117,767         | 0-18                  | 61,689,287                 |
| CIN: abuse and neglect                    | Department for Education <sup>2</sup>                             | County or unitary authority        | 2014-2017 | 811,692         | 0-18                  | 49,532,626                 |
| <b>Household adversity domain</b>         |                                                                   |                                    |           |                 |                       |                            |
| CIN: household dysfunction                | Department for Education <sup>2</sup>                             | County or unitary authority        | 2014-2017 | 450,142         | 0-18                  | 49,532,626                 |
| Family homelessness                       | Ministry of Housing Communities and Local Government <sup>3</sup> | District council                   | 2013-2016 | 147,034         | 0-18                  | 49,177,197                 |
| Lone parents                              | Census 2011 <sup>4</sup>                                          | District council                   | 2011      | 1,671,396       | Households*           | 14,448,646                 |
| Parents in drug/alcohol treatment         | National Drug Treatment Monitoring System <sup>5</sup>            | County or unitary authority        | 2011/12   | 11,830          | 0-15*                 | 10,030,300                 |
| <b>Context domain</b>                     |                                                                   |                                    |           |                 |                       |                            |
| Police recorded crime: drugs              | Police <sup>1</sup>                                               | Community Safety Partnership       | 2013-2017 | 852,217         | 0-18                  | 61,689,287                 |
| Police recorded crime: violence           | Police <sup>1</sup>                                               | Community Safety Partnership       | 2013-2017 | 4,749,641       | 0-18                  | 61,689,287                 |
| Street-level crime: possession of weapons | Police <sup>1</sup>                                               | Latitude and Longitude of crime    | 2013-2017 | 120,319         | 0-90                  | 273,856,259                |
| Suicides                                  | Office for National Statistics <sup>6</sup>                       | District council                   | 2013-2017 | 23,455          | 0-90                  | 273,856,259                |

\* Denominator is provided with the dataset

## 5 Sources for the health and social effects of ACEs, and denominators

| Variable                                            | Source                                                            | Years           | Count of events | Denominator age range | Denominator (person-years) |
|-----------------------------------------------------|-------------------------------------------------------------------|-----------------|-----------------|-----------------------|----------------------------|
| Under 18 conceptions                                | Office for National Statistics <sup>7</sup>                       | 2013-2016       | 104,943         | Female age 13-17      | 7,473,735                  |
| School exclusions                                   | Department for Education <sup>8</sup>                             | 2011/12-2016-17 | 1,900,513       | School pupils*        | 46,601,942                 |
| Admissions for self-harm (age 10-24)                | Public Health England Fingertips <sup>5</sup>                     | 2012-2016       | 197,229         | Oct-24                | 49,176,498                 |
| First time entrants to young justice system         | Public Health England Fingertips <sup>5</sup>                     | 2013-2016       | 76,908          | 10-17*                | 19,615,416                 |
| SEN register (SEM)                                  | Department for Education <sup>9</sup>                             | 2013-2016       | 733,794         | School pupils*        | 32,444,871                 |
| Primary school absences                             | Department for Education <sup>10</sup>                            | 2014/15-2016/17 | 954,294         | School pupils*        | 11,462,677                 |
| Secondary school absences                           | Department for Education <sup>10</sup>                            | 2014/15-2016/17 | 1,152,521       | School pupils*        | 8,553,412                  |
| Homelessness (age 16-24)                            | Ministry of Housing Communities and Local Government <sup>3</sup> | 2013-2017       | 65,239          | 16-24                 | 30,825,853                 |
| Hospital admissions due to substance misuse (15-24) | Public Health England Fingertips <sup>5</sup>                     | 2011/12-2016/17 | 34,400          | 15-24*                | 40,085,143                 |
| Hospital admissions due to alcohol (under 18)       | Public Health England Fingertips <sup>5</sup>                     | 2011/12-2016/17 | 25,882          | 0-18*                 | 67,960,650                 |
| Not in employment, education or training            | Department for Education <sup>11</sup>                            | 2016            | 415,350         | 16-17*                | 1,155,390                  |
| School readiness                                    | Public Health England Fingertips <sup>5</sup>                     | 2012/13-2017/17 | 1,185,193       | 5*                    | 3,271,224                  |

\* Denominator is provided with the dataset

## **6 Imputation of district-level rates of child protection plans, children-in-need events and parents in drug and alcohol treatment**

Local authorities in England can be classified into three groups: (1) county councils, which cover 27 large, mainly rural areas, and provide one tier of services; (2) district councils, which are smaller sub-areas within the county councils; and provide a second tier of services; and (3) unitary authorities, which cover mainly urban areas and provide both tiers of services. Within each county there are 4 to 19 districts. One issue in developing the ACE index was that five indicators related to services provided by county or unitary authorities, and data were not available at the smaller district council level. For example, children's social care is provided by county councils, and therefore the data on child protection plans and 'children in need' are only available at county or unitary level. We therefore imputed these indicators for district councils using the following approach:

1. We fit a poisson regression model of 150 county and unitary authorities, with the count of events (e.g. child protection plans related to abuse) as the dependent variable, a number of independent variables that are available for all types of local authority, and offset by the log population (or person-years if the counts were taken over more than one year). As independent variables, we used the population density, proportion of children living in income deprived households (the IDACI measure of the Index of Multiple Deprivation 2015), the rate of police-recorded crimes related to abuse, the rate of all street-level crimes (which tend to relate to crimes such as violence, theft and shoplifting rather than abuse), the proportion of families with lone parents, and the rate of teenage conceptions.
2. We used the model to predict the count of events for district councils, based on the independent variables and the population (or person-years) for the district council.
3. Within each county, we re-scaled the counts for districts so the predicted total across the districts equalled the actual total for the county. We did this by calculating a ratio between the predicted total and the actual total, and applying it to the predicted district values.
4. We calculated a rate for the districts based on the re-scaled predicted count and the district population (or person-years).

We repeated this process across each of the five indicators. The plots below show the county-level values and the imputed values. The charts include unitary as well as district and county councils. For many ACE indicators, unitary councils have the highest rates as they often include poor urban areas. These areas form the higher rates at the top-right of the plots with no corresponding district councils. The imputation process added substantial variation, but the dominant determinant of imputed values remained the rate in the local county council.

**Figure: Observed rates for county and unitary authorities compared to imputed rates for district councils**

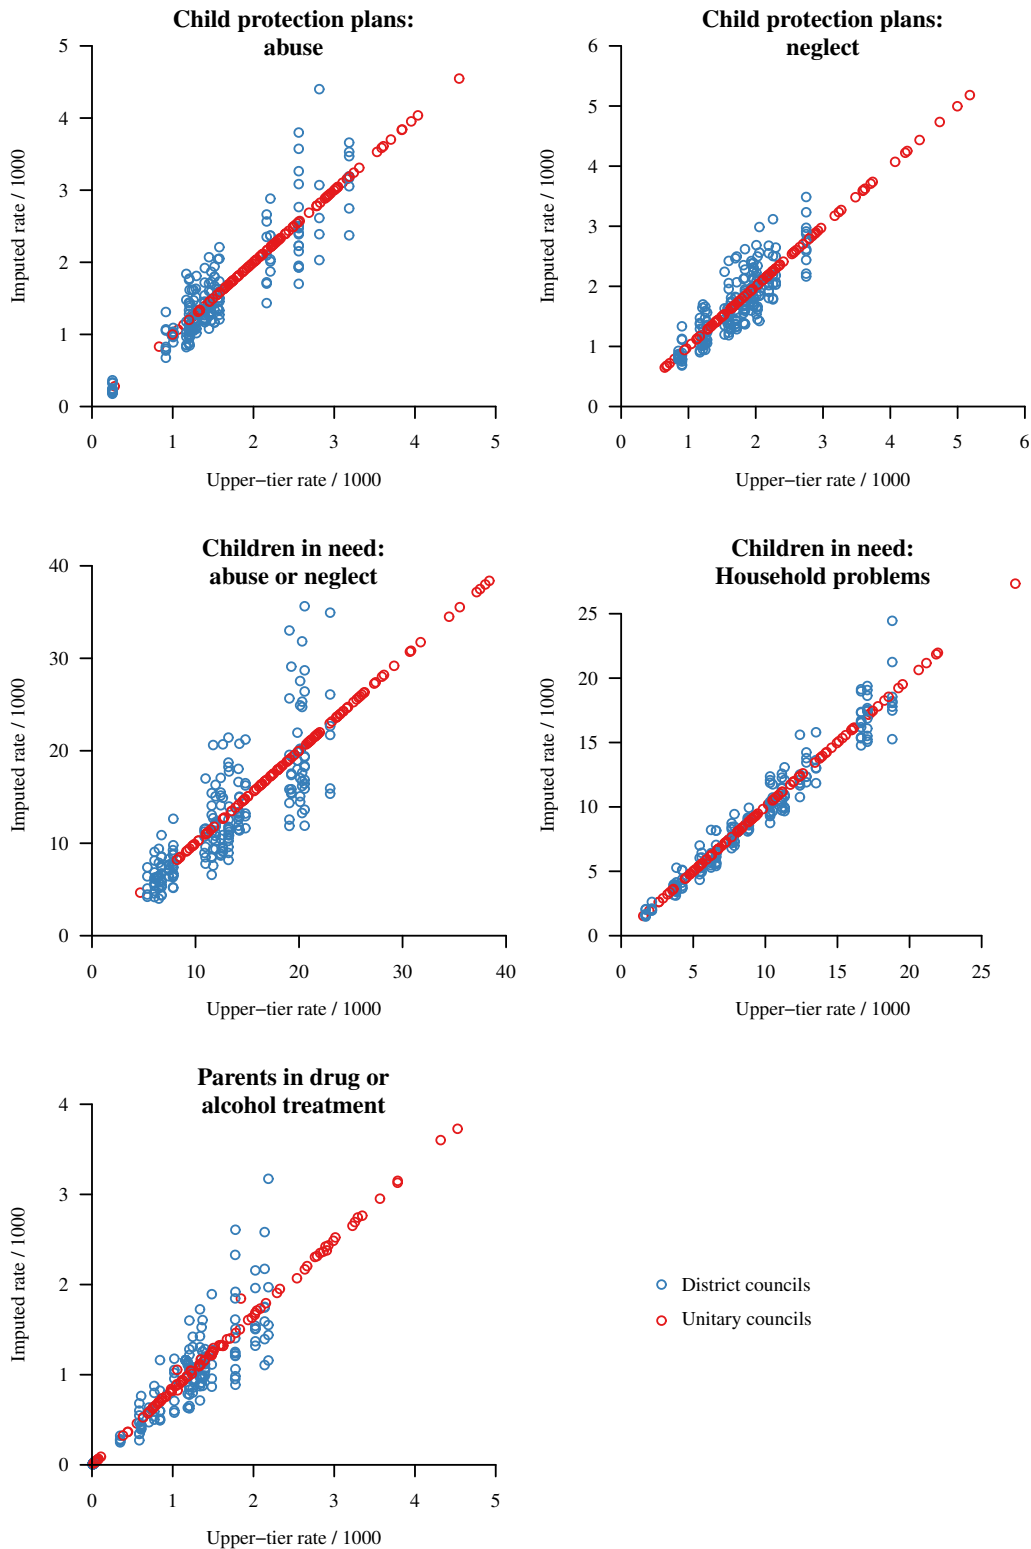



## 7 References for supplementary information

1. Home Office. Police Open Data. 2019. <https://data.police.uk/data/> (accessed Sept 25, 2019).
2. Department for Education. Statistics: children in need and child protection. 2018. <https://www.gov.uk/government/collections/statistics-children-in-need> (accessed Sept 25, 2019).
3. Ministry of Housing, Communities & Local Government. Homelessness Statistics. 2019. <https://www.gov.uk/government/collections/homelessness-statistics> (accessed Sept 25, 2019).
4. Office for National Statistics. 2011 Census: Key Statistics for England and Wales, March 2011. 2012. <https://www.ons.gov.uk/peoplepopulationandcommunity/populationandmigration/populationestimates/bulletins/2011censuskeystatisticsforenglandandwales/2012-12-11> (accessed Sept 25, 2019).
5. Public Health England. Fingertips: Children and Young People's Mental Health and Wellbeing. 2015. <https://fingertips.phe.org.uk/cypmh#page/0/gid/1938133090/pat/6/par/E12000004/ati/102/are/E06000015> (accessed Sept 25, 2019).
6. Office for National Statistics. Suicides in England and Wales by local authority. 2019. <https://www.ons.gov.uk/peoplepopulationandcommunity/birthsdeathsandmarriages/deaths/datasets/suicidesbylocalauthority> (accessed Sept 25, 2019).
7. Office for National Statistics. Conceptions in England and Wales: 2017. 2019. <https://www.ons.gov.uk/peoplepopulationandcommunity/birthsdeathsandmarriages/conceptionandfertilityrates/bulletins/conceptionstatistics/2017> (accessed Sept 25, 2019).
8. Department for Education. Statistics: exclusions. 2019. <https://www.gov.uk/government/collections/statistics-exclusions> (accessed Sept 25, 2019).
9. Department for Education. Statistics: special educational needs (SEN). 2019. <https://www.gov.uk/government/collections/statistics-special-educational-needs-sen> (accessed Sept 25, 2019).
10. Department for Education. Statistics: pupil absence. 2019. <https://www.gov.uk/government/collections/statistics-pupil-absence> (accessed Sept 25, 2019).
11. Department for Education. Statistics: NEET and participation. 2019. <https://www.gov.uk/government/collections/statistics-neet> (accessed Sept 25, 2019).
